# Supplementary material for: Jasmonic Acid Plays a Pivotal Role in Pollen Development and Fertility Regulation in Different Types of P(T)GMS Rice Lines
Source: MDPI journal article supplement (doi:10.3390/ijms22157926), 2021-07-25
Supplement: s1 [file s1]

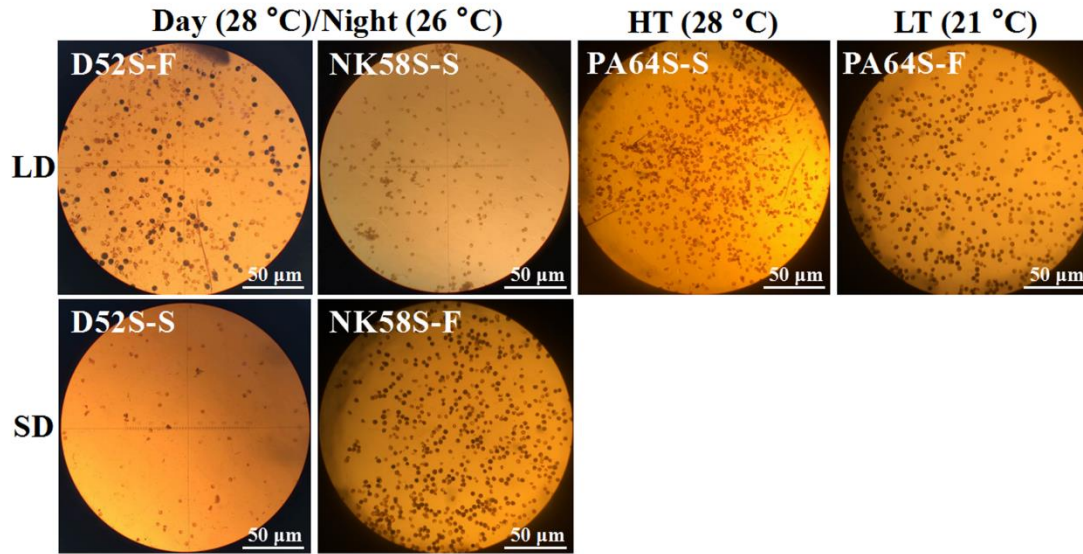

**Figure S1.** Pollen staining of PA64S, D52S and NK58S under photoperiod and temperature treatment. LD, long-day cycle of 14 h-light and 10 h-dark; SD, short-day cycle of 10 h-light and 14 h-dark; HT, high temperature; LT, low temperature; S/F, sterile/fertile plants.

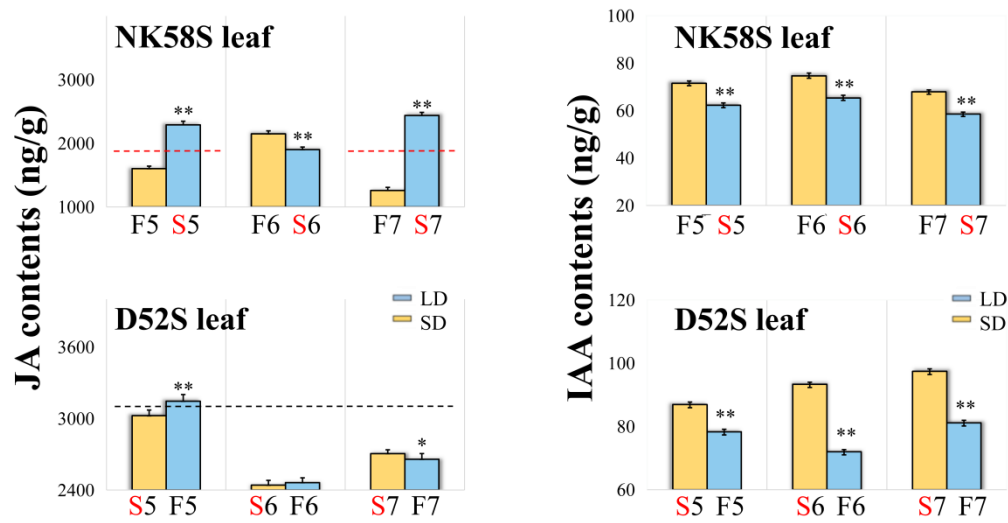

**Figure S2.** Analysis of JA and IAA contents of sword leaf in D52S and NK58S by photoperiod treatment. The contents from LD/SD-treated plants are columnar with blue/yellow colour, respectively. Data are shown as mean  $\pm$  standard deviation ( $n = 3$ ). Asterisks indicate significant differences between fertile and sterile plants revealed by Student's  $t$ -test (\*,  $P < 0.05$ ; \*\*,  $P < 0.01$ ) in the same period. LD, long-day cycle; SD, short-day cycle; S/F, sterile/fertile plants; 5/6/7, 5<sup>th</sup>/6<sup>th</sup>/7<sup>th</sup>-stage; JA, jasmonic acid; IAA, indole-3-acetic acid.

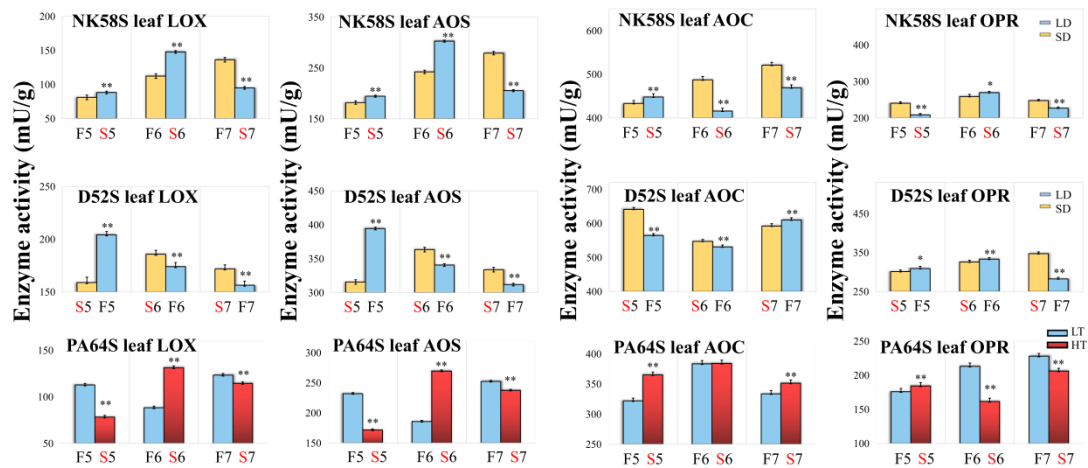

**Figure S3.** Four key enzyme activities of JA synthesis pathway in D52S, NK58S and PA64S leaves by photoperiod and temperature treatment. The LD/SD and HT/LT treated plants are columnar with blue/yellow and red/blue colour, respectively. Data are shown as mean  $\pm$  standard deviation ( $n = 3$ ). Asterisks indicate significant differences between fertile and sterile plants revealed by Student's  $t$ -test (\*,  $P < 0.05$ ; \*\*,  $P < 0.01$ ). LD, long-day cycle; SD, short-day cycle; HT, high temperature; LT, low temperature; S/F, sterile/fertile plants; 5/6/7, 5<sup>th</sup>/6<sup>th</sup>/7<sup>th</sup>-stage; LOX, lipoxygenases; AOS, allene oxide synthase; AOC, allene oxide cyclase; OPR, oxophytodeinoate reductase.

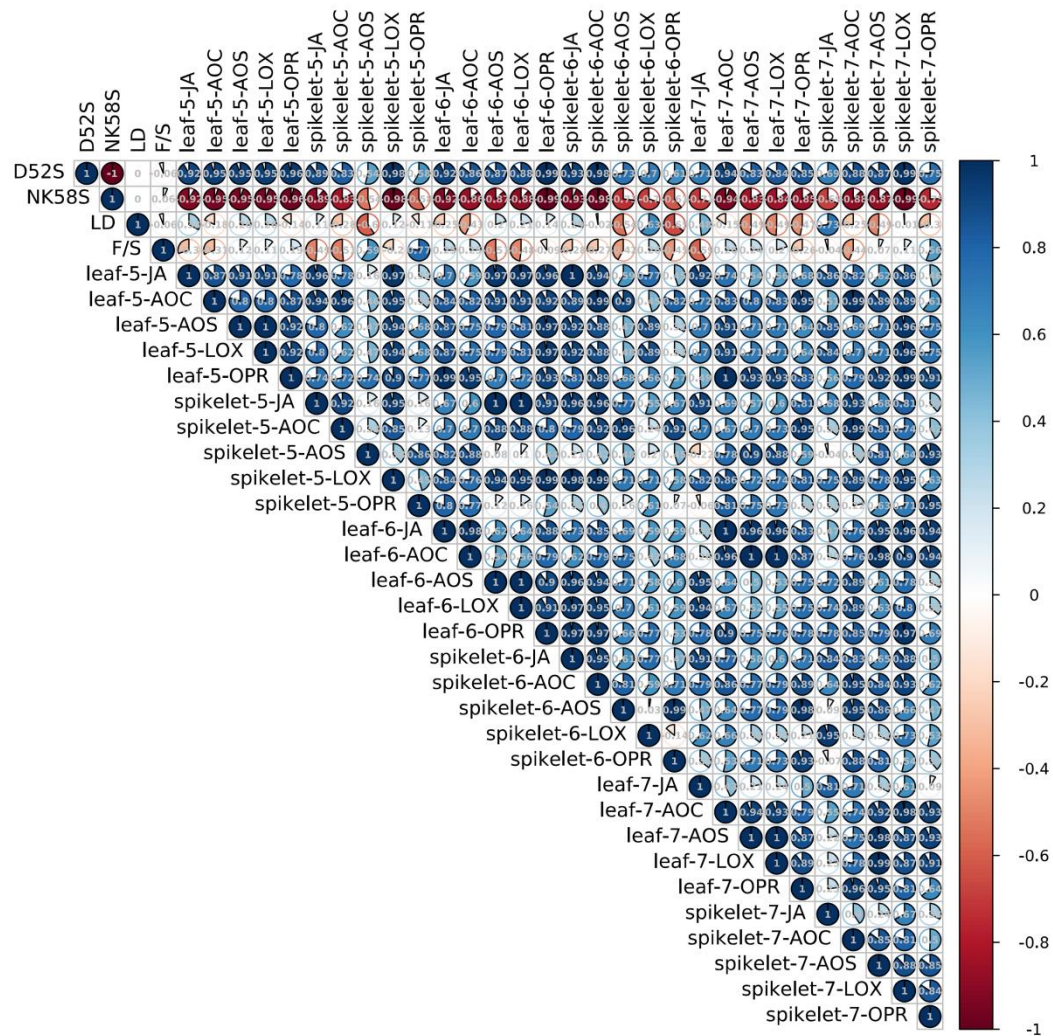

**Figure S4.** Heatmap of correlation analysis of enzyme activities and pollen fertility rate in D52S and NK58S. Pearson correlation coefficient of indicators are listed, and data are from Figure 1 and 2, Figure S2 and S3.

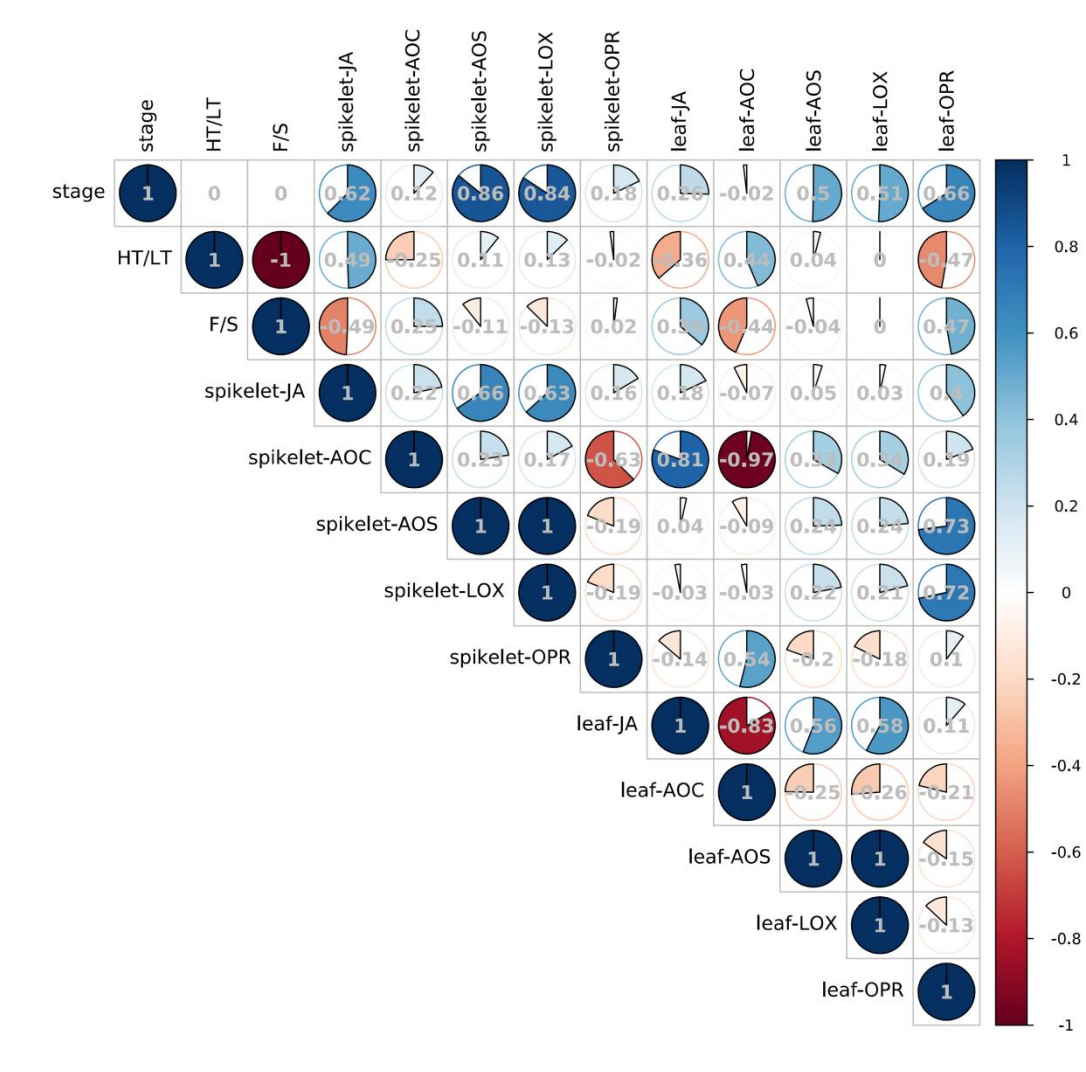

**Figure S5.** Heatmap of correlation analysis of enzyme activities and pollen fertility rate in PA64S. Pearson correlation coefficient of indicators are listed, and data are from Figure 1 and 2, Figure S2 and S3.

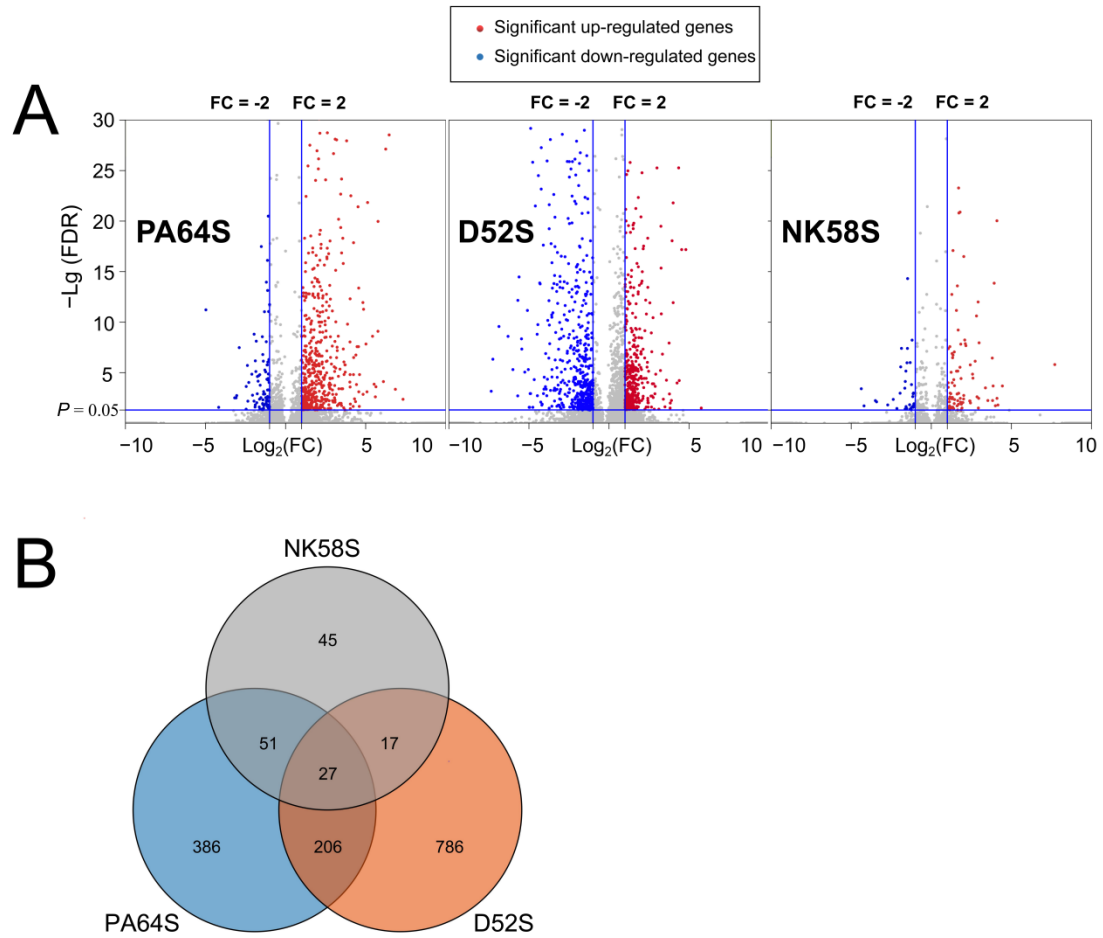

**Figure S6.** Analysis of DEGs between fertile and sterile spikelets from different types of P(T)GMS rice lines. Volcanic maps (A) show DEGs in the 4<sup>th</sup>-stage spikelets between fertile and sterile plants from PA64S, D52S and NK58S. The X-axis indicates the DEGs expression levels with the value of  $\log_2(\text{FC})$ , of which FC compares the ratio of FPKM of DEGs in fertile plant to those in sterile plant, and the Y-axis indicates the significance of DEGs differential expression with the value of  $-\lg(\text{FDR})$ . Two vertical blue lines indicate  $\text{FC} = 2$ , and one horizontal blue line indicates  $P = 0.05$ . A Venn diagram (B) shows the unique and shared DEGs between fertile and sterile spikelets from three P(T)GMS lines. DEG, differentially expressed genes; FPKM, fragments per kilobase of exon model per million mapped reads; FC, fold change.



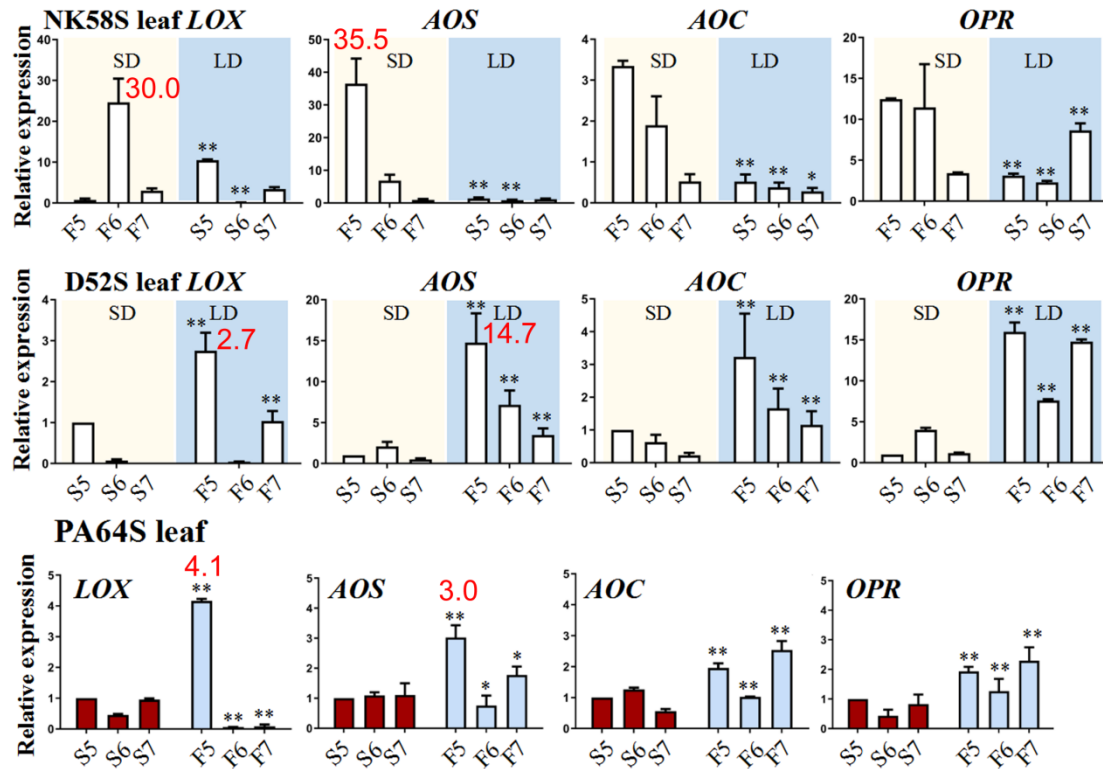

**Figure S7.** Expression analysis of JA synthesis enzyme genes in fertility-induced plants under different photoperiod and temperature conditions. The qPCR analysis of *LOX*, *AOS*, *AOC* and *OPR* genes in leaves of NK58S, D52S and PA64S sterile/fertile lines from 5<sup>th</sup> to 7<sup>th</sup> stage. The internal reference gene is *OsActin*. PA64S are treated by HT/LT are columnar with red and blue colour, respectively. NK58S and D52S treated by LD/SD photoperiod are marked with blue and yellow background, respectively. Data are shown as mean  $\pm$  standard deviation (n = 3). Asterisks indicate significant differences between fertile and sterile plants revealed by Student's *t*-test (\*,  $P < 0.05$ ; \*\*,  $P < 0.01$ ). The significant FC of gene expression in fertile plants compared to those in sterile plants are listed above columnar in red. LD, long-day cycle; SD, short-day cycle; HT, high temperature; LT, low temperature; S/F, sterile/fertile plants; 5/6/7, 5<sup>th</sup>/6<sup>th</sup>/7<sup>th</sup>-stage.

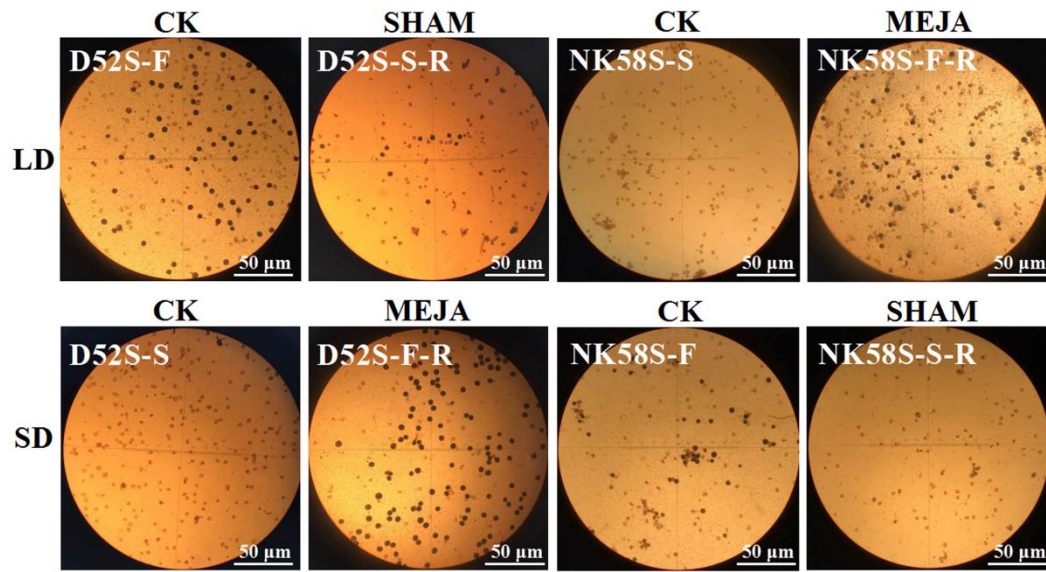

**Figure S8.** Pollen staining of D52S and NK58S by MEJA/SHAM-spraying treatment. LD, long-day cycle; SD, short-day cycle; MEJA, methyl jasmonate; SHAM, salicylhydroxamic acid; S/F/R, sterile/fertile/fertility-reverse plants.



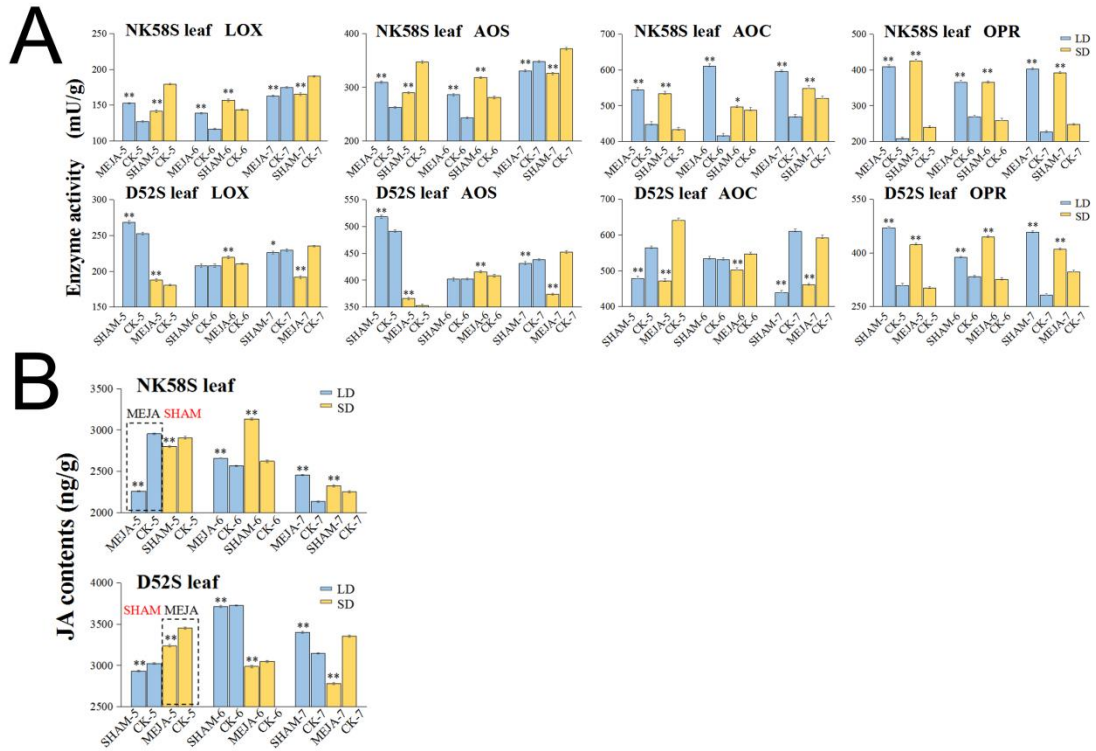

**Figure S9.** Analysis of JA synthesis enzyme activities and contents in D52S and NK58S by MEJA/SHAM-spraying treatment. The enzyme activities of LOX, AOS, AOC and OPR in the leaves from NK58S and D52S (A) and the JA contents (B) are also listed. The LD/SD treated plants are columnar with blue/yellow colour, respectively, the spraying plants was named CK/MEJA/SHAM in X-axis. Data are shown as mean  $\pm$  standard deviation ( $n = 3$ ). Asterisks indicate significant differences from spraying-induced fertile/sterile plants, compared to CK group, revealed by Student's  $t$ -test (\*,  $P < 0.05$ ; \*\*,  $P < 0.01$ ). LD, long-day cycle; SD, short-day cycle; MEJA, methyl jasmonate; SHAM, salicylhydroxamic acid; CK, control; 5/6/7, 5<sup>th</sup>/6<sup>th</sup>/7<sup>th</sup>-stage.

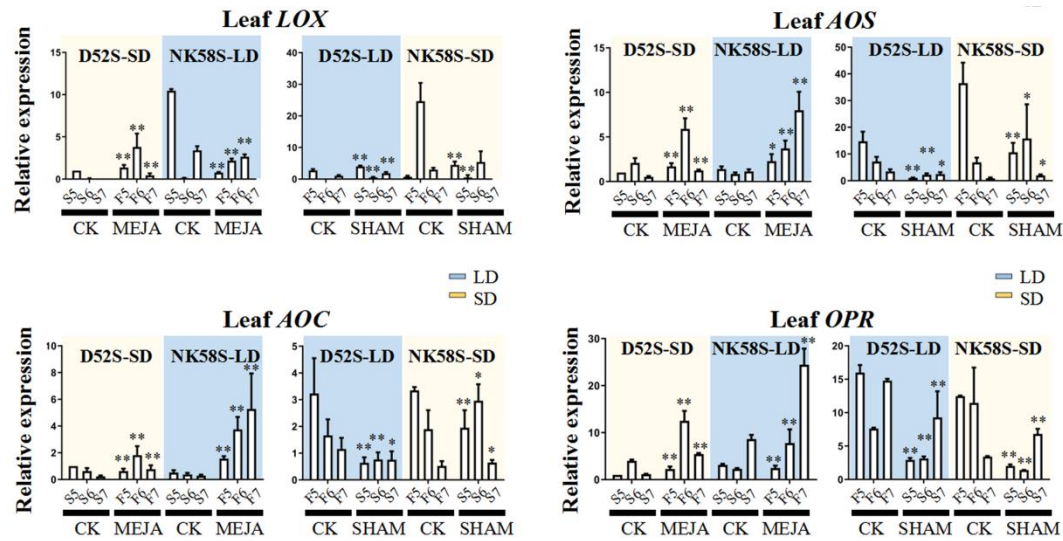

**Figure S10.** Expressions analysis of JA synthesis enzyme genes in the leaves of fertility-reverse plants treated by MEJA/SHAM-spraying treatment. The qPCR analysis of *LOX*, *AOS*, *AOC* and *OPR* in the leaves from NK58S and D52S sterile/fertile/fertility-reverse lines during 5<sup>th</sup>-7<sup>th</sup>-stage. The internal reference gene is *OsActin*. The LD/SD treated plants are columnar with blue/yellow colour, respectively, the spraying plants was named CK/MEJA/SHAM in X-axis. Data are shown as mean  $\pm$  standard deviation ( $n = 3$ ). Asterisks indicate significant differences from spraying-induced fertile/sterile plants, compared to CK group, revealed by Student's *t*-test (\*,  $P < 0.05$ ; \*\*,  $P < 0.01$ ). LD, long-day cycle; SD, short-day cycle; MEJA, methyl jasmonate; SHAM, salicylhydroxamic acid; CK, control; S/F/R, sterile/fertile/fertility-reverse plants; 5/6/7, 5<sup>th</sup>/6<sup>th</sup>/7<sup>th</sup>-stage.

**Table S1.** Sequencing data, statistics and genome comparison analysis from the 4<sup>th</sup>-stage spikelets of PA64S, NK58S and D52S.

| Sample  | Raw reads | Clean reads | Clean ratio <sup>a</sup> | All reads | Mapped reads | Mapped unique reads <sup>b</sup> | Mapping ratio <sup>c</sup> |
|---------|-----------|-------------|--------------------------|-----------|--------------|----------------------------------|----------------------------|
| PA64S-S | 53790413  | 51210131    | 95.21                    | 51024596  | 45697567     | 43481779                         | 89.57                      |
| PA64S-F | 46280604  | 43823754    | 94.65                    | 43648077  | 38702350     | 36875397                         | 88.59                      |
| D52S-S  | 42255637  | 40205882    | 95.16                    | 39976556  | 35490375     | 33838260                         | 88.78                      |
| D52S-F  | 43530215  | 41436642    | 95.19                    | 41254937  | 36777892     | 34980002                         | 89.15                      |
| NK58S-S | 44577617  | 42372393    | 95.06                    | 42187943  | 39741926     | 37882930                         | 94.21                      |
| NK58S-F | 47041822  | 44712212    | 95.06                    | 44555801  | 41958612     | 39977882                         | 94.19                      |

For each sample, data are shown as mean by three biological replicates. <sup>a</sup> Clean ratio = (Clean reads/Raw reads) %; <sup>b</sup> Mapped unique reads, only one location matching reads in the genome. The reference genome information was obtained from the Ensemble database of *Oryza sativa* L. *japonica* (<http://ensemblgenomes.org/>, accessed in 2020); <sup>c</sup> Mapping ratio = Mapped reads/All reads.

**Table S2.** GO enrichment analysis of DEGs in the 4<sup>th</sup>-stage spikelets between fertile and sterile lines from PA64S, NK58S and D52S.

| GO ID        | GO Term                                                     | DEG | UP <sup>a</sup> | DOWN <sup>b</sup> | P-value                | FDR <sup>c</sup>       |
|--------------|-------------------------------------------------------------|-----|-----------------|-------------------|------------------------|------------------------|
| <b>PA64S</b> |                                                             |     |                 |                   |                        |                        |
| GO:0003964   | RNA-directed DNA polymerase activity                        | 1   | 1               | 0                 | $1.26 \times 10^{-17}$ | $8.17 \times 10^{-15}$ |
| GO:0006278   | RNA-dependent DNA replication                               | 1   | 1               | 0                 | $1.45 \times 10^{-16}$ | $4.70 \times 10^{-14}$ |
| GO:0003723   | RNA binding                                                 | 4   | 3               | 1                 | $7.33 \times 10^{-16}$ | $1.59 \times 10^{-13}$ |
| GO:0010200   | response to chitin                                          | 32  | 30              | 2                 | $2.12 \times 10^{-13}$ | $3.44 \times 10^{-11}$ |
| GO:0003700   | sequence-specific DNA binding transcription factor activity | 49  | 44              | 5                 | $1.86 \times 10^{-12}$ | $2.41 \times 10^{-10}$ |
| GO:0009409   | response to cold                                            | 28  | 25              | 3                 | $2.12 \times 10^{-12}$ | $2.30 \times 10^{-10}$ |
| GO:0009408   | response to heat                                            | 20  | 20              | 0                 | $5.95 \times 10^{-12}$ | $5.52 \times 10^{-10}$ |
| GO:0009644   | response to high light intensity                            | 17  | 16              | 1                 | $4.10 \times 10^{-10}$ | $3.33 \times 10^{-8}$  |
| GO:0009611   | response to wounding                                        | 24  | 23              | 1                 | $6.28 \times 10^{-10}$ | $4.53 \times 10^{-8}$  |
| GO:0042542   | response to hydrogen peroxide                               | 15  | 15              | 0                 | $5.09 \times 10^{-9}$  | $3.30 \times 10^{-7}$  |
| GO:0009753   | <b>response to jasmonic acid</b>                            | 17  | 16              | 1                 | $5.80 \times 10^{-9}$  | $3.42 \times 10^{-7}$  |
| GO:0009414   | response to water deprivation                               | 21  | 19              | 2                 | $7.99 \times 10^{-9}$  | $4.32 \times 10^{-7}$  |
| GO:0009738   | <b>abscisic acid-activated signaling pathway</b>            | 17  | 17              | 0                 | $1.10 \times 10^{-8}$  | $5.48 \times 10^{-7}$  |

|            |                                                 |    |    |   |                       |                       |
|------------|-------------------------------------------------|----|----|---|-----------------------|-----------------------|
| GO:0009723 | <b>response to ethylene</b>                     | 19 | 19 | 0 | $1.16 \times 10^{-8}$ | $5.37 \times 10^{-7}$ |
| GO:0035556 | intracellular signal transduction               | 14 | 14 | 0 | $2.74 \times 10^{-8}$ | $1.18 \times 10^{-6}$ |
| GO:0006508 | proteolysis                                     | 2  | 2  | 0 | $3.01 \times 10^{-8}$ | $1.22 \times 10^{-6}$ |
| GO:0042538 | hyperosmotic salinity response                  | 14 | 13 | 1 | $5.22 \times 10^{-8}$ | $1.99 \times 10^{-6}$ |
| GO:0009620 | response to fungus                              | 11 | 11 | 0 | $6.09 \times 10^{-8}$ | $2.20 \times 10^{-6}$ |
| GO:0009733 | <b>response to auxin</b>                        | 18 | 15 | 3 | $1.20 \times 10^{-7}$ | $4.10 \times 10^{-6}$ |
| GO:0006355 | regulation of transcription, DNA-templated      | 35 | 34 | 1 | $2.26 \times 10^{-7}$ | $7.32 \times 10^{-6}$ |
| GO:0034976 | response to endoplasmic reticulum stress        | 13 | 12 | 1 | $3.30 \times 10^{-7}$ | $1.02 \times 10^{-5}$ |
| GO:0009695 | <b>jasmonic acid biosynthetic process</b>       | 12 | 12 | 0 | $4.28 \times 10^{-7}$ | $1.26 \times 10^{-5}$ |
| GO:0030968 | endoplasmic reticulum unfolded protein response | 13 | 13 | 0 | $4.39 \times 10^{-7}$ | $1.24 \times 10^{-5}$ |
| GO:0032880 | regulation of protein localization              | 6  | 6  | 0 | $1.52 \times 10^{-6}$ | $4.12 \times 10^{-5}$ |
| GO:0016798 | hydrolase activity, acting on glycosyl bonds    | 6  | 6  | 0 | $4.43 \times 10^{-6}$ | $1.15 \times 10^{-4}$ |
| GO:0006457 | protein folding                                 | 13 | 13 | 0 | $6.50 \times 10^{-6}$ | $1.62 \times 10^{-4}$ |
| GO:0009266 | response to temperature stimulus                | 9  | 8  | 1 | $7.74 \times 10^{-6}$ | $1.86 \times 10^{-4}$ |
| GO:0016762 | xyloglucan:xyloglucosyl transferase activity    | 4  | 4  | 0 | $8.00 \times 10^{-6}$ | $1.85 \times 10^{-4}$ |
| GO:0006972 | hyperosmotic response                           | 8  | 7  | 1 | $1.28 \times 10^{-5}$ | $2.87 \times 10^{-4}$ |

|             |                                                 |    |    |    |                        |                        |
|-------------|-------------------------------------------------|----|----|----|------------------------|------------------------|
| GO:0009873  | <b>ethylene-activated signaling pathway</b>     | 9  | 9  | 0  | $1.35 \times 10^{-5}$  | $2.91 \times 10^{-4}$  |
| GO:0003677  | DNA binding                                     | 37 | 31 | 6  | $1.45 \times 10^{-5}$  | $3.04 \times 10^{-4}$  |
| GO:0046686  | response to cadmium ion                         | 17 | 15 | 2  | $1.72 \times 10^{-5}$  | $3.49 \times 10^{-4}$  |
| GO:0005509  | calcium ion binding                             | 9  | 9  | 0  | $1.82 \times 10^{-5}$  | $3.57 \times 10^{-4}$  |
| GO:0006833  | water transport                                 | 9  | 8  | 1  | $1.82 \times 10^{-5}$  | $3.57 \times 10^{-4}$  |
| GO:0010286  | heat acclimation                                | 6  | 6  | 0  | $1.87 \times 10^{-5}$  | $3.48 \times 10^{-4}$  |
| GO:0048767  | root hair elongation                            | 11 | 10 | 1  | $2.08 \times 10^{-5}$  | $3.74 \times 10^{-4}$  |
| GO:0006984  | ER-nucleus signaling pathway                    | 3  | 3  | 0  | $2.36 \times 10^{-5}$  | $4.15 \times 10^{-4}$  |
| GO:0009651  | response to salt stress                         | 23 | 21 | 2  | $3.09 \times 10^{-5}$  | $5.28 \times 10^{-4}$  |
| GO:0009646  | response to absence of light                    | 4  | 3  | 1  | $3.70 \times 10^{-5}$  | $6.16 \times 10^{-4}$  |
| GO:0009867  | <b>jasmonic acid mediated signaling pathway</b> | 14 | 14 | 0  | $8.52 \times 10^{-5}$  | $1.23 \times 10^{-3}$  |
| <b>D52S</b> |                                                 |    |    |    |                        |                        |
| GO:0003723  | RNA binding                                     | 4  | 2  | 2  | $1.18 \times 10^{-28}$ | $1.09 \times 10^{-25}$ |
| GO:0009414  | response to water deprivation                   | 41 | 15 | 26 | $2.30 \times 10^{-17}$ | $1.06 \times 10^{-14}$ |
| GO:0006508  | proteolysis                                     | 2  | 0  | 2  | $1.37 \times 10^{-14}$ | $4.24 \times 10^{-12}$ |
| GO:0009737  | <b>response to abscisic acid</b>                | 40 | 13 | 27 | $2.19 \times 10^{-13}$ | $5.06 \times 10^{-11}$ |



|            |                                                  |     |    |     |                        |                        |
|------------|--------------------------------------------------|-----|----|-----|------------------------|------------------------|
| GO:0042538 | hyperosmotic salinity response                   | 25  | 12 | 13  | $3.88 \times 10^{-13}$ | $7.18 \times 10^{-11}$ |
| GO:0009409 | response to cold                                 | 37  | 17 | 20  | $1.27 \times 10^{-12}$ | $1.96 \times 10^{-10}$ |
| GO:0009753 | <b>response to jasmonic acid</b>                 | 24  | 16 | 8   | $2.96 \times 10^{-10}$ | $3.91 \times 10^{-8}$  |
| GO:0009723 | <b>response to ethylene</b>                      | 27  | 13 | 14  | $7.08 \times 10^{-10}$ | $8.19 \times 10^{-8}$  |
| GO:0003674 | molecular function                               | 150 | 43 | 107 | $1.09 \times 10^{-9}$  | $1.12 \times 10^{-7}$  |
| GO:0009611 | response to wounding                             | 31  | 18 | 13  | $1.70 \times 10^{-9}$  | $1.57 \times 10^{-7}$  |
| GO:0009733 | <b>response to auxin</b>                         | 27  | 18 | 9   | $1.91 \times 10^{-9}$  | $1.61 \times 10^{-7}$  |
| GO:0009738 | <b>abscisic acid-activated signaling pathway</b> | 23  | 15 | 8   | $3.18 \times 10^{-9}$  | $2.45 \times 10^{-7}$  |
| GO:0009535 | chloroplast thylakoid membrane                   | 23  | 2  | 21  | $4.86 \times 10^{-9}$  | $3.46 \times 10^{-7}$  |
| GO:0015979 | photosynthesis                                   | 14  | 1  | 13  | $5.16 \times 10^{-9}$  | $3.41 \times 10^{-7}$  |
| GO:0009620 | response to fungus                               | 13  | 9  | 4   | $3.59 \times 10^{-7}$  | $2.22 \times 10^{-5}$  |
| GO:0009579 | thylakoid                                        | 16  | 1  | 15  | $5.05 \times 10^{-7}$  | $2.92 \times 10^{-5}$  |
| GO:0006833 | water transport                                  | 14  | 7  | 7   | $5.30 \times 10^{-7}$  | $2.89 \times 10^{-5}$  |
| GO:0006260 | DNA replication                                  | 10  | 9  | 1   | $7.88 \times 10^{-7}$  | $4.05 \times 10^{-5}$  |
| GO:0009651 | response to salt stress                          | 36  | 19 | 17  | $1.33 \times 10^{-6}$  | $6.48 \times 10^{-5}$  |
| GO:0009506 | plasmodesma                                      | 41  | 26 | 15  | $1.51 \times 10^{-6}$  | $6.97 \times 10^{-5}$  |

|            |                                                  |    |    |    |                       |                       |
|------------|--------------------------------------------------|----|----|----|-----------------------|-----------------------|
| GO:0008283 | cell proliferation                               | 13 | 13 | 0  | $3.04 \times 10^{-6}$ | $1.34 \times 10^{-4}$ |
| GO:0009534 | chloroplast thylakoid                            | 14 | 1  | 13 | $4.58 \times 10^{-6}$ | $1.92 \times 10^{-4}$ |
| GO:0009739 | <b>response to gibberellin</b>                   | 11 | 6  | 5  | $4.83 \times 10^{-6}$ | $1.94 \times 10^{-4}$ |
| GO:0009631 | cold acclimation                                 | 7  | 3  | 4  | $1.15 \times 10^{-5}$ | $4.44 \times 10^{-4}$ |
| GO:0010200 | response to chitin                               | 27 | 19 | 8  | $1.27 \times 10^{-5}$ | $4.71 \times 10^{-4}$ |
| GO:0009644 | response to high light intensity                 | 15 | 6  | 9  | $1.34 \times 10^{-5}$ | $4.78 \times 10^{-4}$ |
| GO:0030076 | light-harvesting complex                         | 4  | 0  | 4  | $1.46 \times 10^{-5}$ | $5.00 \times 10^{-4}$ |
| GO:0009695 | <b>jasmonic acid biosynthetic process</b>        | 13 | 10 | 3  | $2.19 \times 10^{-5}$ | $7.22 \times 10^{-4}$ |
| GO:0009750 | response to fructose                             | 11 | 5  | 6  | $3.18 \times 10^{-5}$ | $1.01 \times 10^{-3}$ |
| GO:0006268 | DNA unwinding involved in DNA replication        | 3  | 3  | 0  | $3.72 \times 10^{-5}$ | $1.15 \times 10^{-3}$ |
| GO:0007165 | signal transduction                              | 18 | 14 | 4  | $5.44 \times 10^{-5}$ | $1.62 \times 10^{-3}$ |
| GO:0035556 | intracellular signal transduction                | 13 | 12 | 1  | $5.62 \times 10^{-5}$ | $1.62 \times 10^{-3}$ |
| GO:0006612 | protein targeting to membrane                    | 24 | 18 | 6  | $5.68 \times 10^{-5}$ | $1.59 \times 10^{-3}$ |
| GO:0070838 | divalent metal ion transport                     | 9  | 2  | 7  | $6.24 \times 10^{-5}$ | $1.70 \times 10^{-3}$ |
| GO:0010363 | regulation of plant-type hypersensitive response | 24 | 18 | 6  | $6.37 \times 10^{-5}$ | $1.68 \times 10^{-3}$ |
| GO:0009538 | photosystem I reaction center                    | 3  | 0  | 3  | $6.57 \times 10^{-5}$ | $1.69 \times 10^{-3}$ |

|            |                                                  |    |   |    |                       |                       |
|------------|--------------------------------------------------|----|---|----|-----------------------|-----------------------|
| GO:0051726 | regulation of cell cycle                         | 9  | 9 | 0  | $8.42 \times 10^{-5}$ | $2.10 \times 10^{-3}$ |
| GO:0001666 | response to hypoxia                              | 8  | 1 | 7  | $8.65 \times 10^{-5}$ | $2.11 \times 10^{-3}$ |
| GO:0016161 | beta-amylase activity                            | 3  | 0 | 3  | $1.07 \times 10^{-4}$ | $2.55 \times 10^{-3}$ |
| GO:0006275 | regulation of DNA replication                    | 8  | 8 | 0  | $1.20 \times 10^{-4}$ | $2.77 \times 10^{-3}$ |
| GO:0010295 | <b>(+)-abscisic acid 8'-hydroxylase activity</b> | 2  | 0 | 2  | $5.41 \times 10^{-5}$ | $8.56 \times 10^{-4}$ |
| GO:0009832 | plant-type cell wall biogenesis                  | 9  | 2 | 7  | $6.88 \times 10^{-5}$ | $1.06 \times 10^{-3}$ |
| GO:0006612 | protein targeting to membrane                    | 17 | 2 | 15 | $7.44 \times 10^{-5}$ | $1.12 \times 10^{-3}$ |
| GO:0010363 | regulation of plant-type hypersensitive response | 17 | 2 | 15 | $8.16 \times 10^{-5}$ | $1.20 \times 10^{-3}$ |
| GO:0009867 | <b>jasmonic acid mediated signaling pathway</b>  | 14 | 0 | 14 | $8.52 \times 10^{-5}$ | $1.23 \times 10^{-3}$ |

---

#### NK58S

|            |                                    |   |   |   |                       |                       |
|------------|------------------------------------|---|---|---|-----------------------|-----------------------|
| GO:0009646 | response to absence of light       | 3 | 3 | 0 | $1.00 \times 10^{-6}$ | $2.46 \times 10^{-4}$ |
| GO:0009266 | response to temperature stimulus   | 5 | 4 | 1 | $1.22 \times 10^{-6}$ | $1.50 \times 10^{-4}$ |
| GO:0009644 | response to high light intensity   | 6 | 6 | 0 | $1.43 \times 10^{-6}$ | $1.17 \times 10^{-4}$ |
| GO:0006833 | water transport                    | 5 | 4 | 1 | $2.19 \times 10^{-6}$ | $1.34 \times 10^{-4}$ |
| GO:0009408 | response to heat                   | 6 | 6 | 0 | $2.85 \times 10^{-6}$ | $1.40 \times 10^{-4}$ |
| GO:0032880 | regulation of protein localization | 3 | 3 | 0 | $5.13 \times 10^{-6}$ | $2.10 \times 10^{-4}$ |

|            |                                                          |   |   |   |                       |                       |
|------------|----------------------------------------------------------|---|---|---|-----------------------|-----------------------|
| GO:0006457 | protein folding                                          | 6 | 6 | 0 | $5.14 \times 10^{-6}$ | $1.80 \times 10^{-4}$ |
| GO:0048574 | long-day photoperiodism, flowering                       | 2 | 1 | 1 | $9.21 \times 10^{-6}$ | $2.82 \times 10^{-4}$ |
| GO:0006972 | hyperosmotic response                                    | 4 | 3 | 1 | $1.06 \times 10^{-5}$ | $2.89 \times 10^{-4}$ |
| GO:0009739 | <b>response to gibberellin</b>                           | 4 | 3 | 1 | $1.12 \times 10^{-5}$ | $2.75 \times 10^{-4}$ |
| GO:0042542 | response to hydrogen peroxide                            | 5 | 5 | 0 | $1.20 \times 10^{-5}$ | $2.67 \times 10^{-4}$ |
| GO:0031225 | anchored component of membrane                           | 5 | 3 | 2 | $1.49 \times 10^{-5}$ | $3.04 \times 10^{-4}$ |
| GO:0046686 | response to cadmium ion                                  | 7 | 5 | 2 | $2.11 \times 10^{-5}$ | $3.97 \times 10^{-4}$ |
| GO:0009733 | <b>response to auxin</b>                                 | 6 | 5 | 1 | $3.46 \times 10^{-5}$ | $6.06 \times 10^{-4}$ |
| GO:0050113 | inositol oxygenase activity                              | 1 | 0 | 1 | $4.60 \times 10^{-5}$ | $7.52 \times 10^{-4}$ |
| GO:0019370 | leukotriene biosynthetic process                         | 1 | 1 | 0 | $4.60 \times 10^{-5}$ | $7.52 \times 10^{-4}$ |
| GO:0018131 | oxazole or thiazole biosynthetic process                 | 1 | 1 | 0 | $4.60 \times 10^{-5}$ | $7.52 \times 10^{-4}$ |
| GO:0080164 | regulation of nitric oxide metabolic process             | 1 | 1 | 0 | $4.60 \times 10^{-5}$ | $7.52 \times 10^{-4}$ |
| GO:0002540 | leukotriene production involved in inflammatory response | 1 | 1 | 0 | $4.60 \times 10^{-5}$ | $7.52 \times 10^{-4}$ |
| GO:0009612 | response to mechanical stimulus                          | 3 | 3 | 0 | $4.76 \times 10^{-5}$ | $5.84 \times 10^{-4}$ |
| GO:0045176 | apical protein localization                              | 1 | 0 | 1 | $9.19 \times 10^{-5}$ | $1.07 \times 10^{-3}$ |
| GO:0042754 | negative regulation of circadian rhythm                  | 1 | 0 | 1 | $9.19 \times 10^{-5}$ | $1.32 \times 10^{-3}$ |

|            |                                           |   |   |   |                       |                       |
|------------|-------------------------------------------|---|---|---|-----------------------|-----------------------|
| GO:0010038 | response to metal ion                     | 1 | 1 | 0 | $9.19 \times 10^{-5}$ | $1.32 \times 10^{-3}$ |
| GO:0051592 | response to calcium ion                   | 1 | 1 | 0 | $9.19 \times 10^{-5}$ | $1.32 \times 10^{-3}$ |
| GO:0005528 | FK506 binding                             | 2 | 2 | 0 | $1.06 \times 10^{-4}$ | $1.04 \times 10^{-3}$ |
| GO:0000413 | protein peptidyl-prolyl isomerization     | 2 | 2 | 0 | $1.06 \times 10^{-4}$ | $1.44 \times 10^{-3}$ |
| GO:0018208 | peptidyl-proline modification             | 2 | 2 | 0 | $1.06 \times 10^{-4}$ | $1.44 \times 10^{-3}$ |
| GO:0009687 | <b>abscisic acid metabolic process</b>    | 1 | 1 | 0 | $1.53 \times 10^{-4}$ | $1.34 \times 10^{-3}$ |
| GO:0009228 | thiamine biosynthetic process             | 1 | 1 | 0 | $1.53 \times 10^{-4}$ | $1.97 \times 10^{-3}$ |
| GO:0009611 | response to wounding                      | 6 | 6 | 0 | $1.58 \times 10^{-4}$ | $1.29 \times 10^{-3}$ |
| GO:0009753 | <b>response to jasmonic acid</b>          | 3 | 2 | 1 | $2.29 \times 10^{-4}$ | $1.81 \times 10^{-3}$ |
| GO:0009930 | longitudinal side of cell surface         | 1 | 0 | 1 | $2.29 \times 10^{-4}$ | $2.67 \times 10^{-3}$ |
| GO:0048767 | root hair elongation                      | 4 | 3 | 1 | $2.64 \times 10^{-4}$ | $1.96 \times 10^{-3}$ |
| GO:0007030 | Golgi organization                        | 4 | 3 | 1 | $3.18 \times 10^{-4}$ | $2.29 \times 10^{-3}$ |
| GO:0010215 | cellulose microfibril organization        | 1 | 0 | 1 | $3.20 \times 10^{-4}$ | $2.24 \times 10^{-3}$ |
| GO:0009695 | <b>jasmonic acid biosynthetic process</b> | 1 | 1 | 0 | $3.20 \times 10^{-4}$ | $3.27 \times 10^{-3}$ |
| GO:0048827 | phyllome development                      | 1 | 0 | 1 | $3.20 \times 10^{-4}$ | $3.27 \times 10^{-3}$ |
| GO:0006096 | glycolytic process                        | 4 | 3 | 1 | $3.44 \times 10^{-4}$ | $2.22 \times 10^{-3}$ |

|            |                                                 |   |   |   |                       |                       |
|------------|-------------------------------------------------|---|---|---|-----------------------|-----------------------|
| GO:0030243 | cellulose metabolic process                     | 2 | 1 | 1 | $4.20 \times 10^{-4}$ | $2.64 \times 10^{-3}$ |
| GO:0045300 | acyl-[acyl-carrier-protein] desaturase activity | 1 | 0 | 1 | $4.26 \times 10^{-4}$ | $2.61 \times 10^{-3}$ |

---

It is showing the top forty GO terms from PA64S, NK58S or D52S, which related to hormone are marked with red colour. <sup>a</sup> Number of significantly up-regulated genes in the 4<sup>th</sup>-stage spikelets compared with fertile and sterile plants; <sup>b</sup> Number of significantly down-regulated genes in the 4<sup>th</sup>-stage spikelets compared with fertile and sterile plants; <sup>c</sup> FDR is less than or equal to 0.05 as the threshold to define as GO terms significantly enriched in DEGs. GO, Gene Ontology; DEGs, differentially expressed genes; FDR, modified *p*-value.



**Table S3.** A Primer information of candidate genes related to JA biosynthesis.

| Gene name     | Raplocus     | 5'-3'                 |
|---------------|--------------|-----------------------|
| <i>OsLOX</i>  | Os03g0700700 | CAGCAAGATCACCGAAGCTC  |
|               |              | AGAATGGTCCTGCTCGCATA  |
| <i>OsAOS1</i> | Os03g0767000 | GCTCTTCCTCCGATACGACTC |
|               |              | GCCTTCTTGAGCGAGGTGA   |
| <i>OsAOC3</i> | Os03g0438100 | TGTTTCCTCCCTGCGATGAG  |
|               |              | GTAGTGGCGGTCGTTGTAGT  |
| <i>OsOPR7</i> | Os08g0459600 | CATTGAGATCCATGGTGCTC  |
|               |              | CTGAATCATAGGCGTCAAGG  |
